# Supplementary material
Source: publisher site journal article supplement (https://www.dovepress.com/article/245749)
Supplement: Supplementary file 1 [file get_supplementary_file.php]

**Supplementary Table**: Full gene list for the intersection from the three datasets (GSE9893, GSE31831, and GSE129544)

| Genes up-regulated in both T47DR and MCF7R cell lines (|Fold Change| > 2, p < 0.05) and associated with both overall survival and cancer-specific survival in breast cancer patients treated with tamoxifen (HR > 1.5, p < 0.01). | *ITGA5 ABCB7 CXCR4 BRCA1 EIF4G3 DGUOK ABR FOXM1 CDIPT SNX6 POLG SRP72 CAPN1 UPF3A LTBR RBBP6 ADCY3 CPVL SNRPC JRK NF1 PROS1 MYC KIF1B MRPL37 PPARD MAN1A1 DUSP3 GBE1 TOM1L1 MFN1 RBM5 MCM2 PWP1 PLXNB2 METAP2 SNAPC2 OSBP2 ACP1 RASA1 TCF20 ADNP POLD1 HMGCS1 TLK2 SCAP* ***SIRT1*** *FLII RPS16 RFC5 FBXO2 PHKB LBR ATRX USF2 PSMA1 SYNGR3 COQ7 USP10 PDXK DMPK AHCY MAPK9 SYNGR2 SOX17 TNKS CRLF1 EEF1B2 PPP1R12C RFC4 NUP50 CUL1 RTN4 BTBD3 P4HA2 DEDD STX1A SNRPA1 PREB FIGNL1 FOXL2 FADS3 CLU DIAPH1 TRAF4 HPRT1 PSMA7 PC MLLT10 ZFP64 DEAF1 MCM3AP CANX UGP2 E2F6 ST13 SAE1 TBCD PSEN1 WAC TOB1 TCEAL1 SLC38A5 CXADR MTRR MGAT4B RAB35 ESRRA BACE2 ARIH1 NEBL GPRC5C CARD14 CHAF1A CACNA1H FDFT1 UBE2D3 CNOT7 AP2B1 SURF4 CCNDBP1 STAT1 CASP8AP2 TARBP1 CREM SRRM1 EEF1A2 ZFX TRIP6 COL4A2 GFPT1 TSSC4 PUM2* ***SRC*** *PGF SH3BP5 MCM7 DCLRE1A SRD5A1 ZNF142 OSBPL1A NFE2L1 GSPT1 PMPCB DNM2 NFS1 MAPRE2 CNOT8 CTNND1 IGBP1 STX1B GALNT1 CPNE7 CLDN4 MANBAL NR1H3 TSSC1 ZNF148 APEH SLC25A16 SPTAN1 PTK7 USP25 SLPI PRPS1 NAP1L4 GAMT PFKFB3 OBSCN MED6 FGFRL1 RIN1 MEN1 PPP1R12B MARCKS PLXNA2 TPM4 S100A4 NPEPPS SMARCD2 POLE2 CAD CKAP2 MSX1 CTSL REL CHRD ARHGDIA CUL4A RANBP2 ATP2A2 ADAM15 SDCCAG3 OSBPL5* |
| --- | --- |
